# Supplementary material for: Experimental and Computational Analysis of MnO2@V2C-MXene for Enhanced Energy Storage
Source: MDPI journal article supplement (doi:10.3390/nano11071707), 2021-06-29
Supplement: s1 [file s1]

## Supplementary Materials:

### Experimental and Computational Analysis of $\text{MnO}_2@\text{V}_2\text{C}$ -MXene for Enhanced Energy Storage

Figure S1 show FTIR plots for pristine  $\text{V}_2\text{C}$  MXene and (10%, 20%, 30% 40%, 50% weight)  $\text{MnO}_2/\text{V}_2\text{C}$  nanocomposites. The peak at  $2337\text{ cm}^{-1}$  is typically seen for the MXene sheets [1]. An intense peak is also observed at  $2074\text{ cm}^{-1}$  represent to stretching of  $\text{C} \equiv \text{C}$  bond while a small bump is also observed around  $1975\text{ cm}^{-1}$  which contributes to  $\text{C}=\text{C}$  and  $\text{C}=\text{O}$  vibrations [2]. The peaks in the region between  $500\text{ cm}^{-1}$  to  $550\text{ cm}^{-1}$  are the characteristic peak of V-O bands [3]. A peak is majorly observed in  $\text{MnO}_2\text{-V}_2\text{C}$  nanocomposite samples around  $936\text{-}1031\text{ cm}^{-1}$ . This peak does not exist in Pristine MXene and is only existing in  $\text{MnO}_2\text{-V}_2\text{C}$  composite which is an evidence contributing to  $\text{Mn}=\text{O}$  bonds presence and shows the presence of  $\text{MnO}_2$  with  $\text{V}_2\text{C}$  as M Mylarappa et al. shows transmittance peaks of  $\text{MnO}_2$  [4]. The layered structure of  $\text{V}_2\text{C}$  samples exists after  $\text{MnO}_2$  adsorbed at variated percentage intercalation in  $\text{V}_2\text{C}$  till 40% however, the destruction caused in  $\text{V}_2\text{C}$  sheets is comparably higher when we increase  $\text{MnO}_2$  percentage beyond 40% in the structure with the destruction of MXene sheets. At equal ratios, i.e. 50% of  $\text{MnO}_2\text{-V}_2\text{C}$  ratio, the  $\text{V}=\text{C}$  bonds are not observable and different peaks at  $1601\text{ cm}^{-1}$  and  $1343\text{ cm}^{-1}$  arise which contribute to the presence of  $\text{Mn}=\text{O}$  bonds [5]. Several small transmission peaks around  $1000\text{--}1500\text{ cm}^{-1}$  are assigned to bending vibrations of bonds of O-H which are connected with Mn-atoms [6].

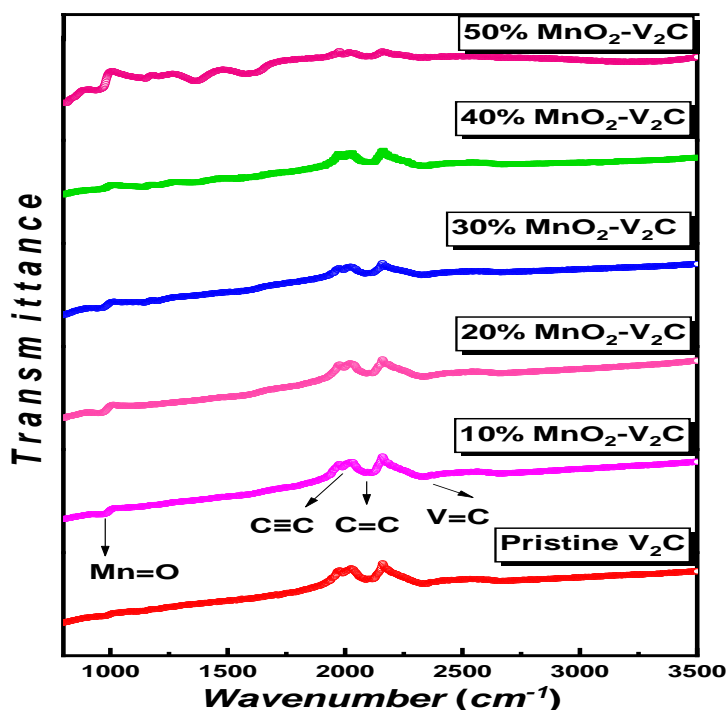

**Figure S1.** FTIR plots for Pristine MXene  $\text{V}_2\text{C}$  and  $\text{MnO}_2\text{-V}_2\text{C}$  nanocomposite at varying percentages.

Raman Spectroscopy was initiated at room temperature for analysis of the acoustic and optical modes. Argon ion laser radiation wavelength  $514\text{ nm}$  was focused to a spot size of  $\sim 1\text{ }\mu\text{m}$  with an incident power kept below  $1\text{ mW}$ . The knowledge about phonon spectrum of  $\text{V}_2\text{AlC}$ , Pristine  $\text{V}_2\text{C}$  and  $\text{MnO}_2@\text{V}_2\text{C}$  composite can be obtained which has several broad peaks ranging from  $200$  to  $2100\text{ cm}^{-1}$  and is assigned as non-stoichiometric. The crystallographic structure of  $\text{V}_2\text{C}$  has 3 atoms of the primitive unit cell in  $\text{V}_2\text{C}$  monosheet which give rise to 6 optical modes and 3 acoustic modes at the  $\Gamma$  point of the Brillouin

zone [7]. The information regarding the phonon spectrum is essential for understanding macroscopic properties such as electrical and thermal properties, so the phonon spectrum of Pristine  $V_2C$  was studied from literature, also Gao et al. reports the phonon dispersions for  $V_2C$  [8]. Without terminations,  $V_2C$  consist of three acoustic modes from which two acoustic modes exhibit linear dispersion near  $\Gamma$  and thus correspond to an in-plane vibrations. The G band is a result of in-plane vibrations of  $sp^2$  bonded Carbon atoms. On the contrary, third acoustic mode corresponds to an out-of-plane vibration of V-atoms and has a quadratic dispersion close to  $\Gamma$ . This out of plane vibration of V-atoms results in D band and is attributed to the presence of structural defects. The above-mentioned quadratic dependence has an analogy to the one observed in graphene, which is also considered as parental family to MXenes system [9].  $V_2C$  with termination groups, such as -F and -OH results in different optical and acoustic modes as in the case of  $V_2CF_2$ , the 5 atoms of primitive unit cell led to 12 optical modes and 3 acoustic modes at the  $\Gamma$  point of the Brillouin zone. In the case of  $V_2C(OH)_2$ , the 7 atoms of each primitive cell led to 18 optical modes and 3 acoustic modes at the  $\Gamma$  point of the Brillouin zone.

## References

1. Rafiq S, Awan S, Zheng R, Wen Z, Rani M, Akinwande D and Rizwan S. Novel room-temperature ferromagnetism in Gd-doped 2-dimensional  $Ti_3C_2$  T x MXene semiconductor for spintronics. *J. of Magnetism and Magnetic Materials*. **2019**,165954.
2. Luo J, Tao X, Zhang J, Xia Y, Huang H, Zhang L, Gan Y, Liang C and Zhang W.  $Sn^{4+}$  Ion Decorated Highly Conductive  $Ti_3C_2$  MXene: Promising Lithium-Ion Anodes with Enhanced Volumetric Capacity and Cyclic Performance. *ACS Nano*. **2016**, 10, 2491–2499, doi:10.1021/acsnano.5b07333.
3. Haining Ji, Dongqing Liu, Haifeng Cheng, Chaoyang Zhang, Lixiang Yang and Dewei Ren. Infrared thermochromic properties of monoclinic  $VO_2$  nanopowders using a malic acid-assisted hydrothermal method for adaptive camouflage. *RSC Adv.*, **2017**, 7, 5189–5194.
4. M Mylarappa, V Venkata Lakshmi, K R Vishnu Mahesh, H P Nagaswarupa and N Raghavendra. A facile hydrothermal recovery of nano sealed  $MnO_2$  particle from waste batteries: An advanced material for electrochemical and environmental applications. *IOP Conf. Ser.: Mater. Sci. Eng.* **2016**, 149, 012178.
5. M. Minakshi, P. Singh, T.B. Issa, S. Thurgate, R.D. Marco, J. Power Sources. Lithium insertion into manganese dioxide electrode in  $MnO_2/Zn$  aqueous battery Part II. Comparison of the behavior of EMD and battery grade  $MnO_2$  in  $Zn|MnO_2|$  aqueous  $LiOH$  electrolyte. *J. of Power Sources*. **2004**, 138, 319–322.
6. D.P. Dubal, W.B.Kim, C.D.Lokhande. Galvanostatically deposited Fe:  $MnO_2$  electrodes for supercapacitor application. *J. of Physics and Chemistry of Solids*. **2012**, 73, 18–24.
7. Aur\_elie Champagne, Lu Shi, Thierry Ouisse, Benoît Hackens, and Jean-Christophe Charlier. Electronic and vibrational properties of  $V_2C$ -based MXenes: From experiments to first-principles modelling. *Phys. Rev.* **2018**, B 97, 115439.
8. Guoying Gao, Guangqian Ding, Jie Li, Kailun Yao, Menghao Wu and Meichun Qian. Monolayer MXenes: Promising half-metals and spin gapless semiconductors. *Nanoscale*. **2016**, 8, 8986–8994.
9. M. S. Dresselhaus and P. C. Eklund. Phonons in carbon nanotubes. *Adv. Phys.* **2000**, 49, 705.
